# Supplementary material
Source: PubMed Central journal article supplement (PMC7339901)

Supplemental Figure 1

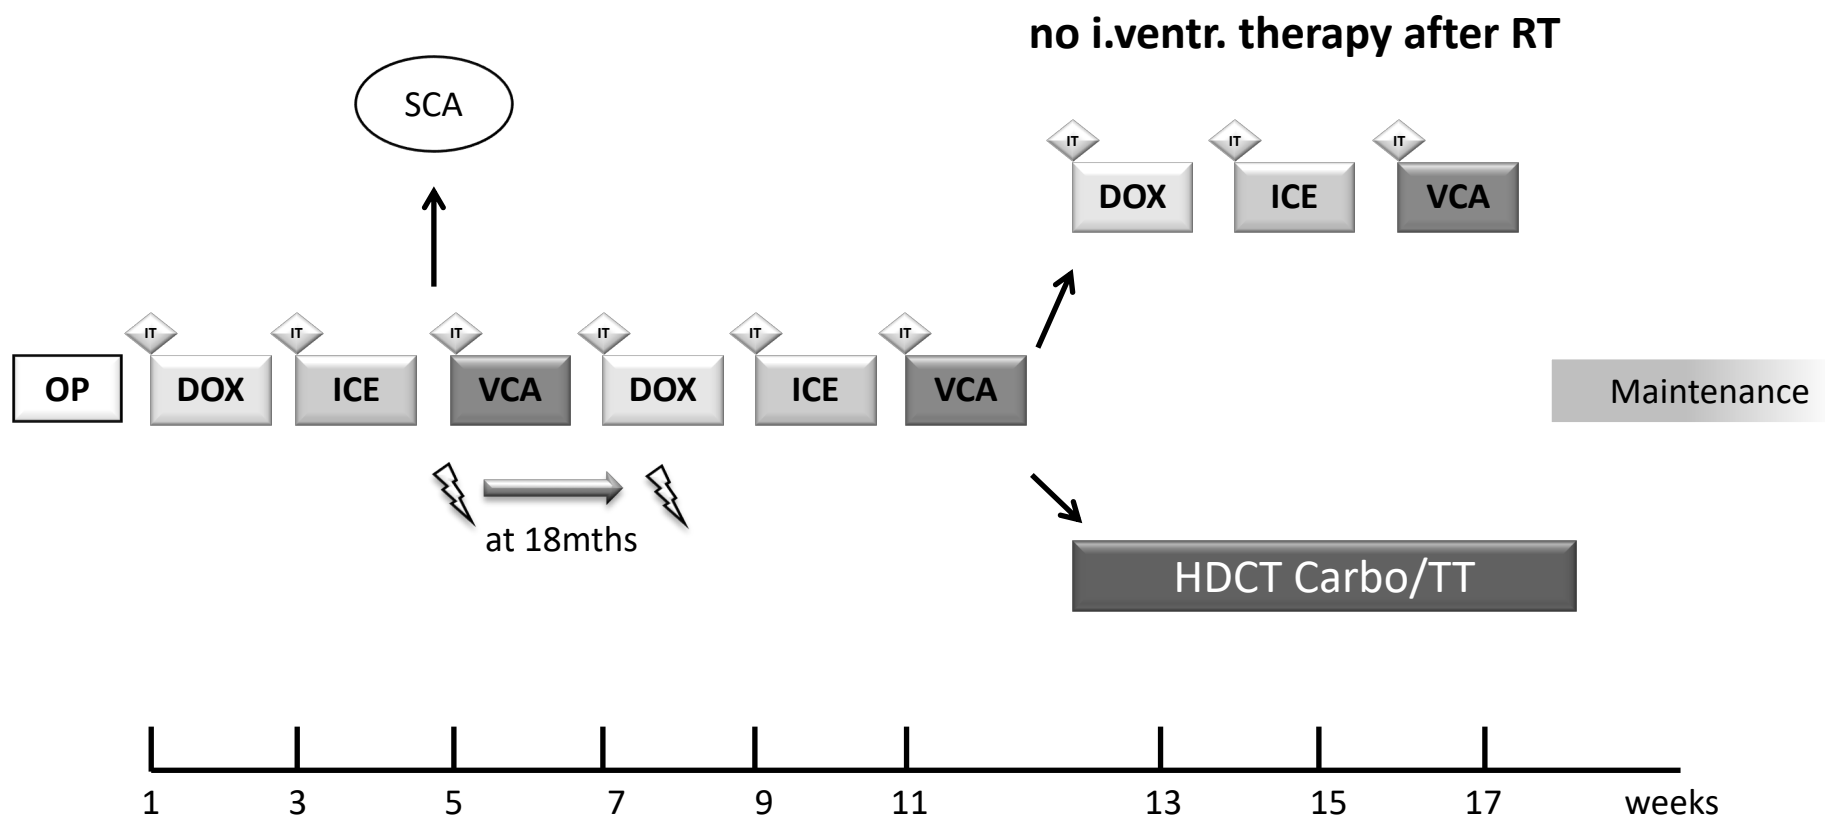

Supplement: noz244_suppl_supplementary_figure_1.pdf [file noz244_suppl_supplementary_figure_1.pdf]

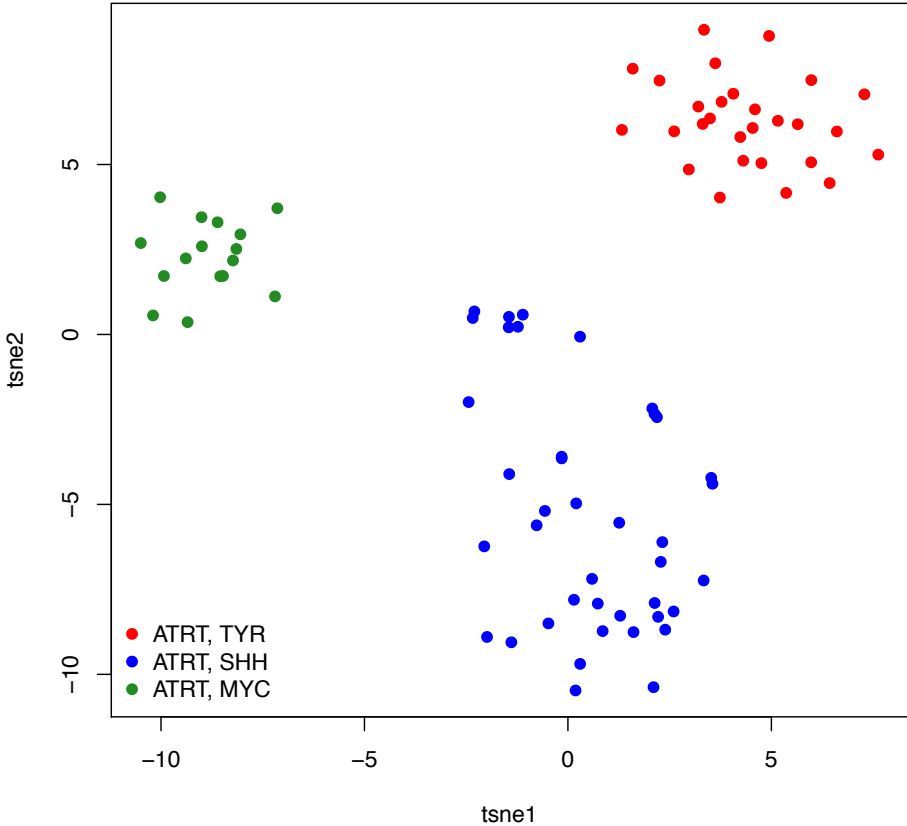

EU-RHAB Cohort

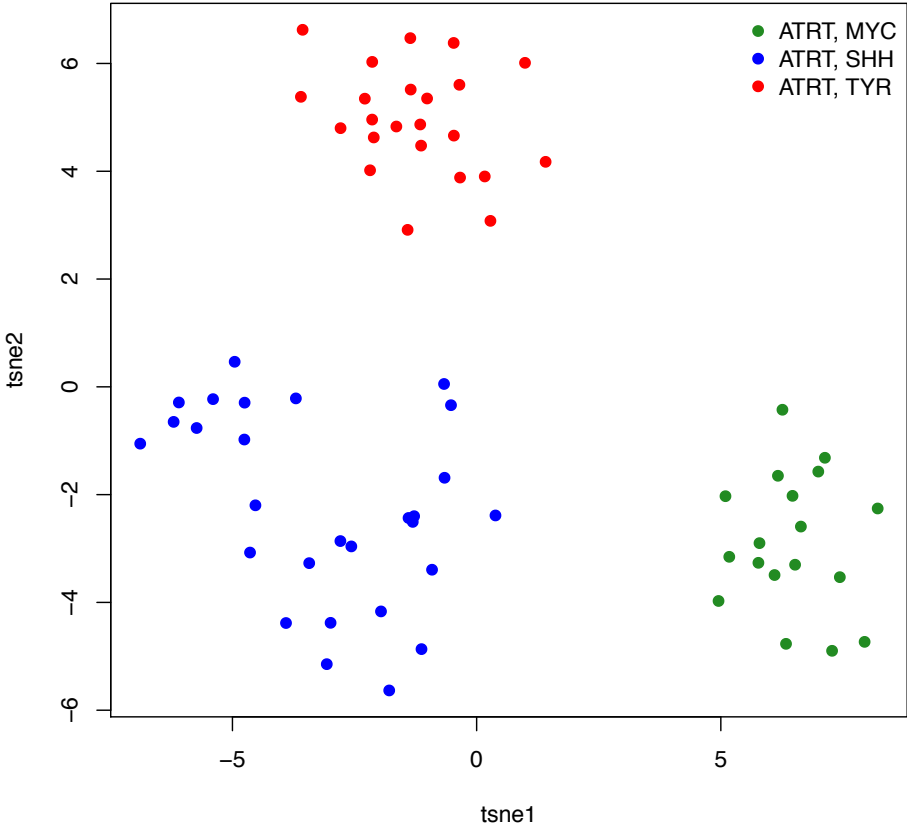

Validation Cohort

Supplement: noz244_suppl_supplementary_figure_2.pdf [file noz244_suppl_supplementary_figure_2.pdf]

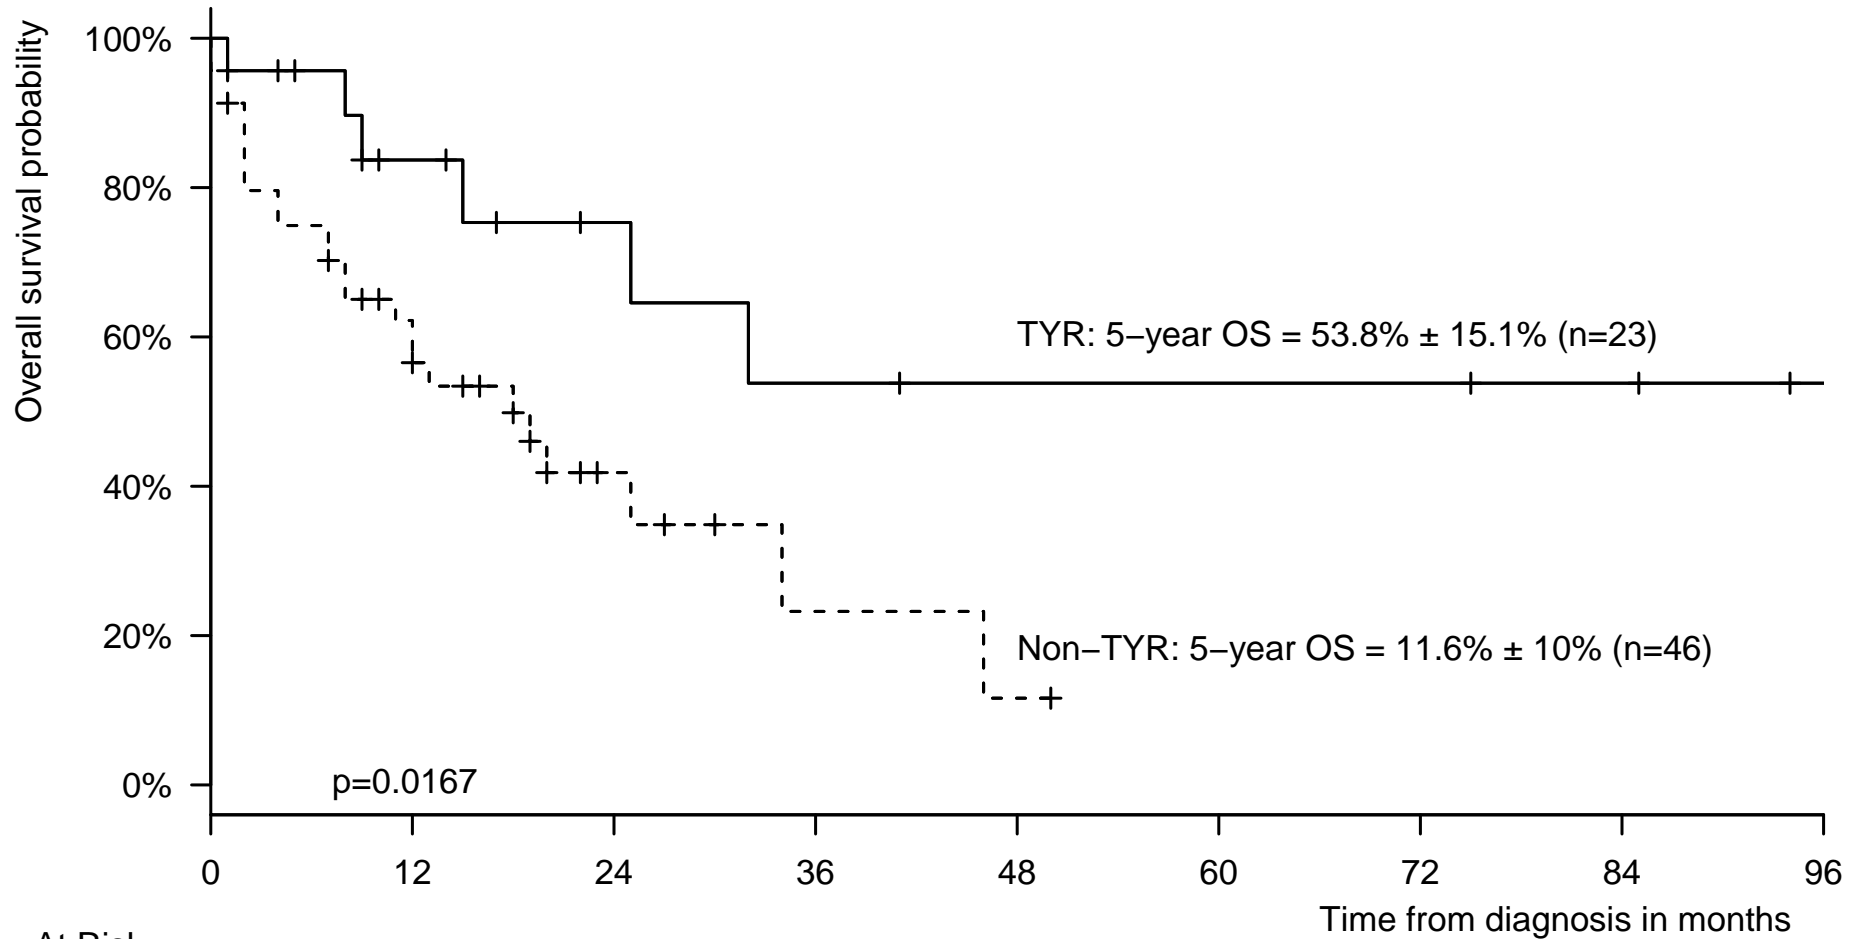

At Risk:

TYR: 23

Non-TYR: 46

11

22

7

6

5

2

4

1

4

0

4

0

3

0

1

0

Supplement: noz244_suppl_supplementary_figure_3.pdf [file noz244_suppl_supplementary_figure_3.pdf]
